# Supplementary material
Source: PubMed Central journal article supplement (PMC4043149)
Supplement: NIHMS585900-supplement-supplement_1.pdf [file NIHMS585900-supplement-supplement_1.pdf]

### Supplementary Table 1: Cell Viability assessed with Trypan Blue

| <u>Treatment</u> | <u>Mean % Trypan Blue Positive</u> | <u>S.D.</u> |
|------------------|------------------------------------|-------------|
| Control          | 15.2                               | 1.6         |
| 9A               | 15.3                               | 0.4         |
| 9B               | 12.2                               | 1.3         |
| 9C               | 15.6                               | 2.4         |
| 9D               | 15.5                               | 1.6         |
| 9E               | 13.4                               | 1.7         |
| 9F               | 16.3                               | 0.9         |

Data are compiled from three separate determinations as described in the Materials and Methods.

## Supplementary Table 2: Hits from the screens of the Prestwick Compound Library

| <u>Compound Name</u>                                                                                 | <u>Primary Known Action*</u>                                     |
|------------------------------------------------------------------------------------------------------|------------------------------------------------------------------|
| <b><u>Compounds that inhibited in both runs at a threshold <math>\geq</math> 60%</u></b>             |                                                                  |
| Amodiaquin dihydrochloride dihydrate (CID 64646)                                                     | 4-aminoquinoline anti-inflammatory                               |
| Amoxapine (CID 2170)                                                                                 | Antipsychotic neurotransmitter reuptake blocker                  |
| Auranofin (CID 24199313)                                                                             | Oral chrysotherapeutic for rheumatoid arthritis                  |
| Carvedilol (CID 2585)                                                                                | Non-selective beta blocker                                       |
| Chrysene-1,4-quinone (CID 180933)                                                                    | Component of petroleum fuel exhaust fumes <sup>1</sup>           |
| Desloratadine (CID 124087)                                                                           | Antihistamine with selective and peripheral H1-antagonist action |
| Disulfiram (CID 3117)                                                                                | Antabuse, used as an alcohol deterrent                           |
| Ethoxyquin (CID 3293)                                                                                | Antioxidant; prevents scald on apples and pears                  |
| Olanzapine (CID 4585)                                                                                | Atypical antipsychotic                                           |
| Oxyphenbutazone (CID 4641)                                                                           | Non-steroidal anti-inflammatory drug                             |
| Thimerosal (CID 16684434)                                                                            | Used as a vaccine preservative                                   |
| <b><u>Additional compounds that inhibited in both runs when the threshold was reduced to 50%</u></b> |                                                                  |
| Oxiconazole Nitrate (CID 9556529)                                                                    | Antifungal medication                                            |
| Sertaconazole nitrate (CID 65863)                                                                    | Antifungal medication                                            |
| <b><u>Additional compounds that inhibited in both runs when the threshold was reduced to 40%</u></b> |                                                                  |
| Astemizole (CID 2247)                                                                                | Long-acting, non-sedative antihistaminic                         |
| Azelastine HCl (CID 54360)                                                                           | Antihistamine and mast cell stabilizer                           |
| Bromperidol (CID 156321)                                                                             | Dopamine D2-receptor antagonist                                  |
| Butoconazole nitrate (CID 47472)                                                                     | Imidazole derivative antifungal                                  |
| Cisapride (CID 2769)                                                                                 | Substituted benzamide that improves GI motility.                 |
| Haloperidol (CID 3559)                                                                               | Used primarily to treat schizophrenia                            |
| Lobeline alpha (-) hydrochloride (CID 101615)                                                        | Respiratory stimulant                                            |
| Norcyclobenzaprine (CID 9918)                                                                        | Metabolite of a muscle relaxant                                  |
| Proscillaridin A (CID 5284613)                                                                       | Cardiotonic glycoside                                            |
| Quinacrine dihydrochloride dihydrate (CID 237)                                                       | Inhibits PLA2, formerly used as an antimalarial                  |
| Zotepine (CID 5736)                                                                                  | Antipsychotic                                                    |

\*Summarized from PubChem Compound data (<http://pubchem.ncbi.nlm.nih.gov/>), except <sup>1</sup>, from Lorber, A.; Simon, T. M.; Leeb, J.; Peter, A.; Wilcox, S. A. J Rheumatol Suppl 1979, 5, 82-90.
